# Supplementary figures and images for: The Rho-guanine nucleotide exchange factor PDZ-RhoGEF governs susceptibility to diet-induced obesity and type 2 diabetes
Source: eLife journal article supplement (doi:10.7554/elife.06011), 2015-10-29

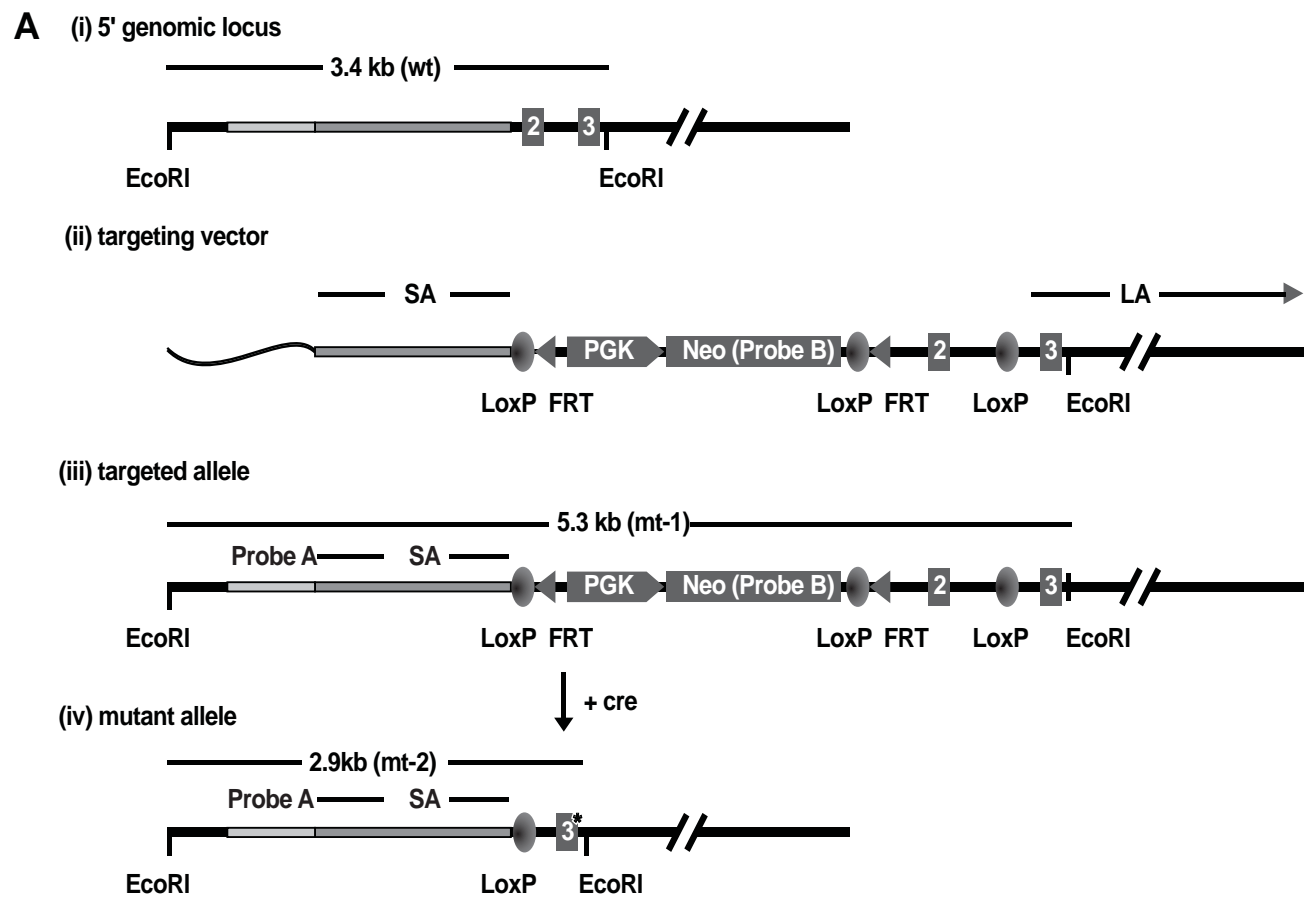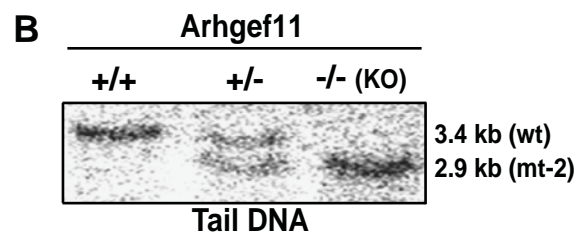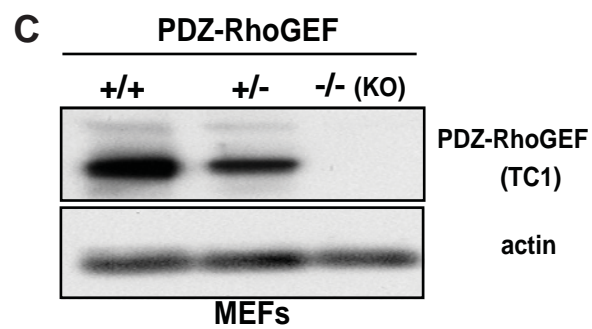

Supplement: supp [file elife_poa_e06011_Figure_1_figure_supplement_1.pdf › elife_poa_e06011_Figure_1_figure_supplement_1.pdf]

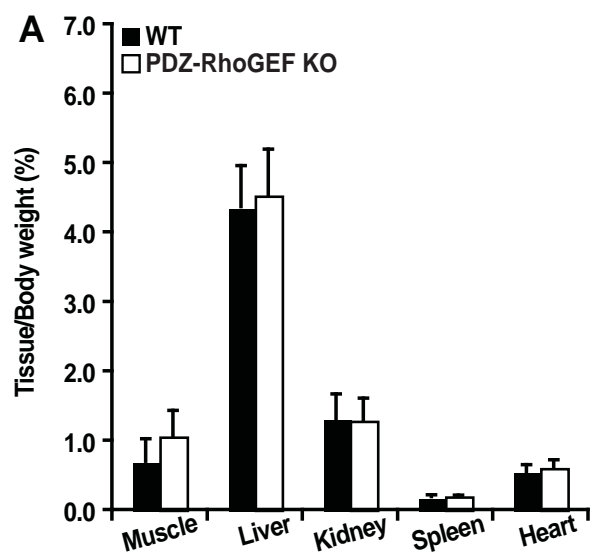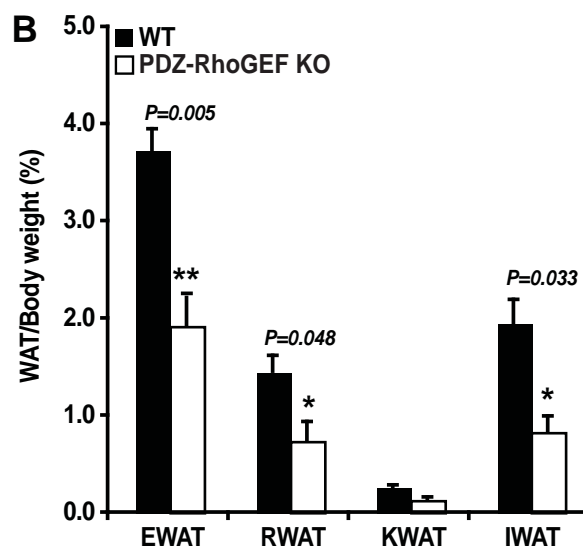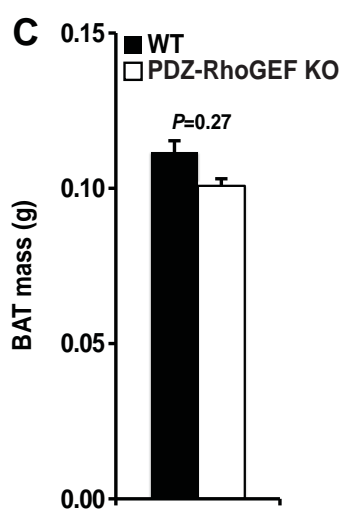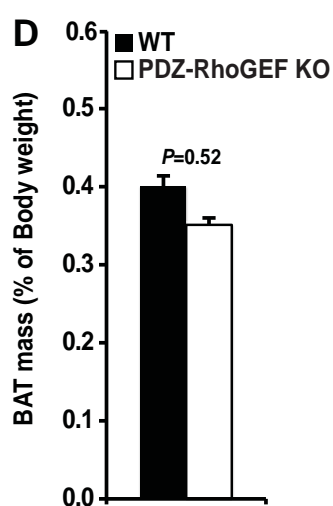

Chang et al. Figure 1, supplement 2

Supplement: supp [file elife_poa_e06011_Figure_1_figure_supplement_2.pdf › elife_poa_e06011_Figure_1_figure_supplement_2.pdf]

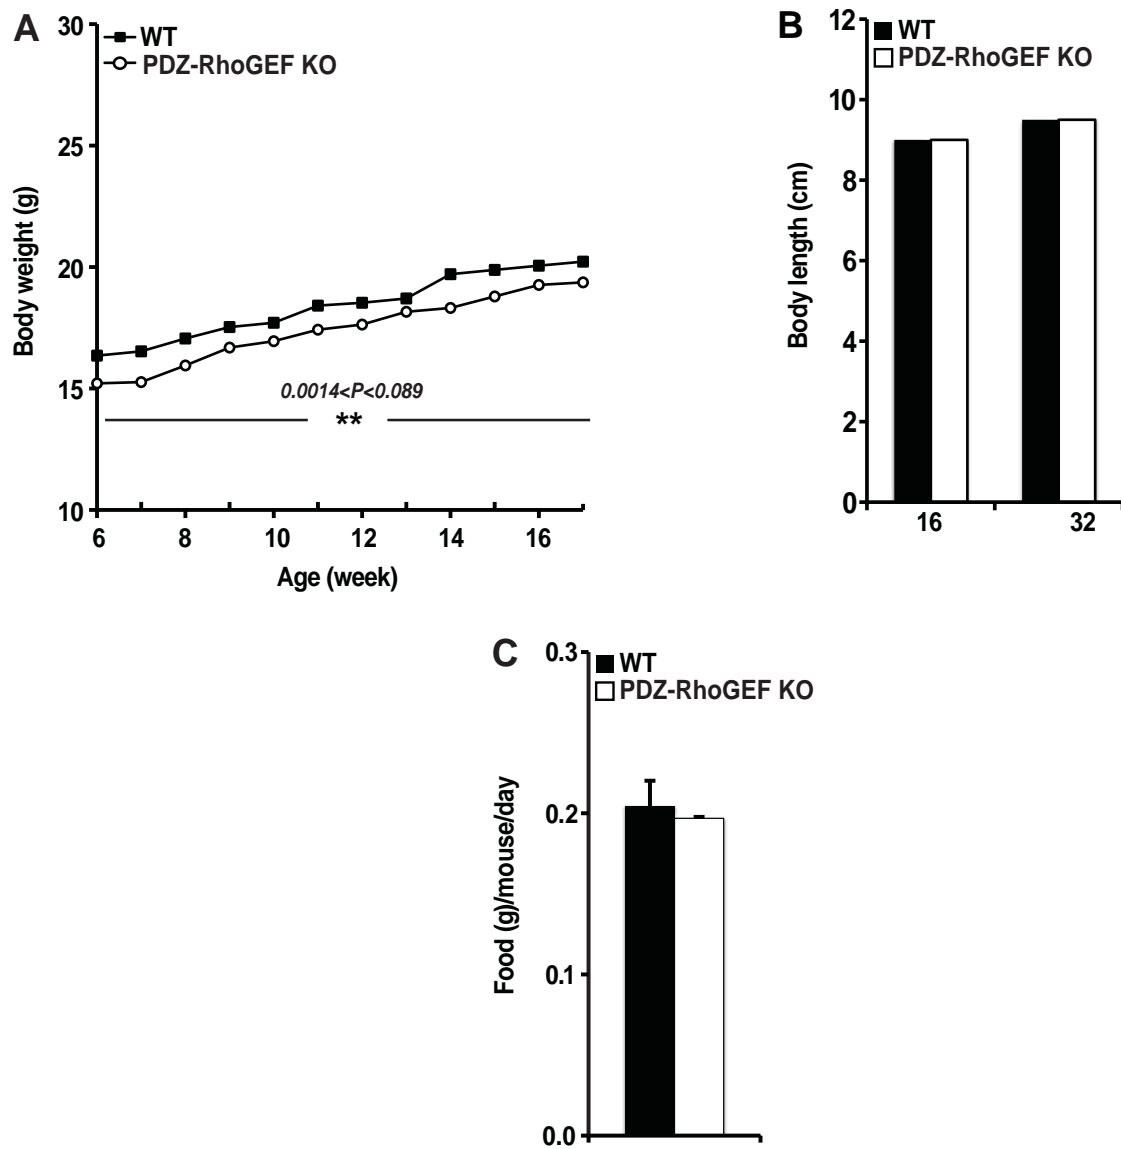

Chang et al. Figure 1, supplement 3

Supplement: supp [file elife_poa_e06011_Figure_1_figure_supplement_3.pdf › elife_poa_e06011_Figure_1_figure_supplement_3.pdf]

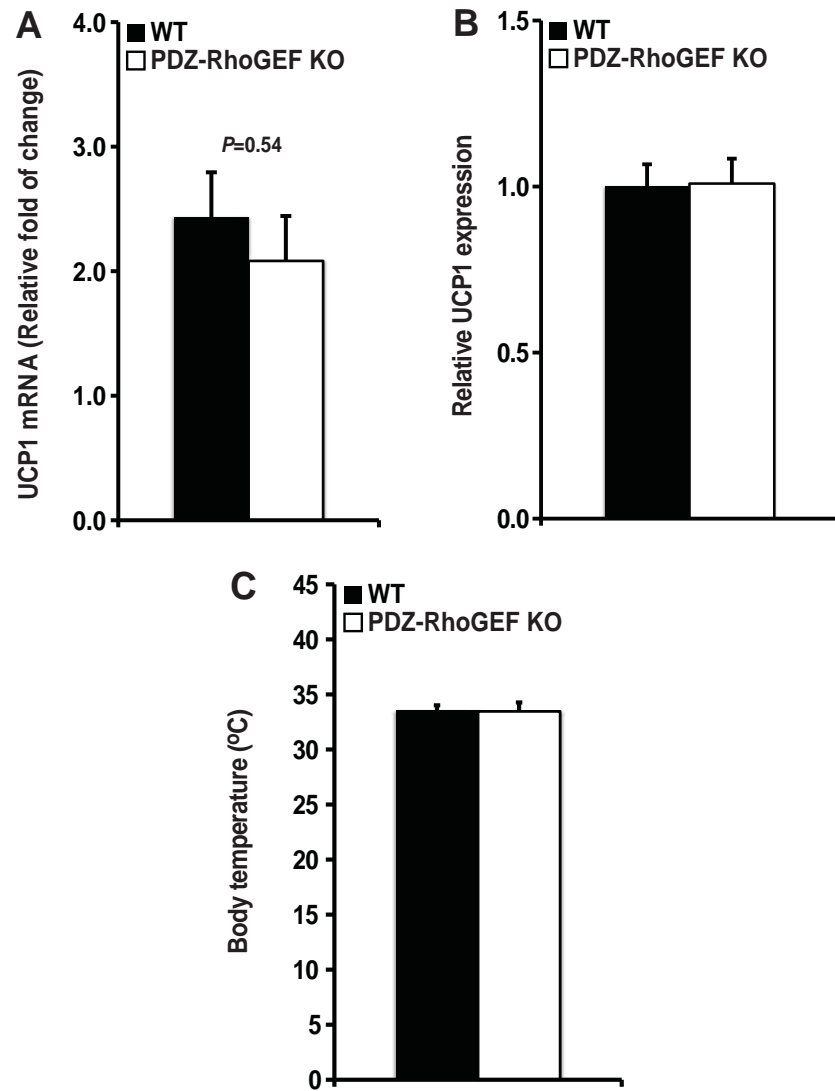

Chang et al. Figure 2, supplement 1

Supplement: supp [file elife_poa_e06011_Figure_2_figure_supplement_1.pdf › elife_poa_e06011_Figure_2_figure_supplement_1.pdf]

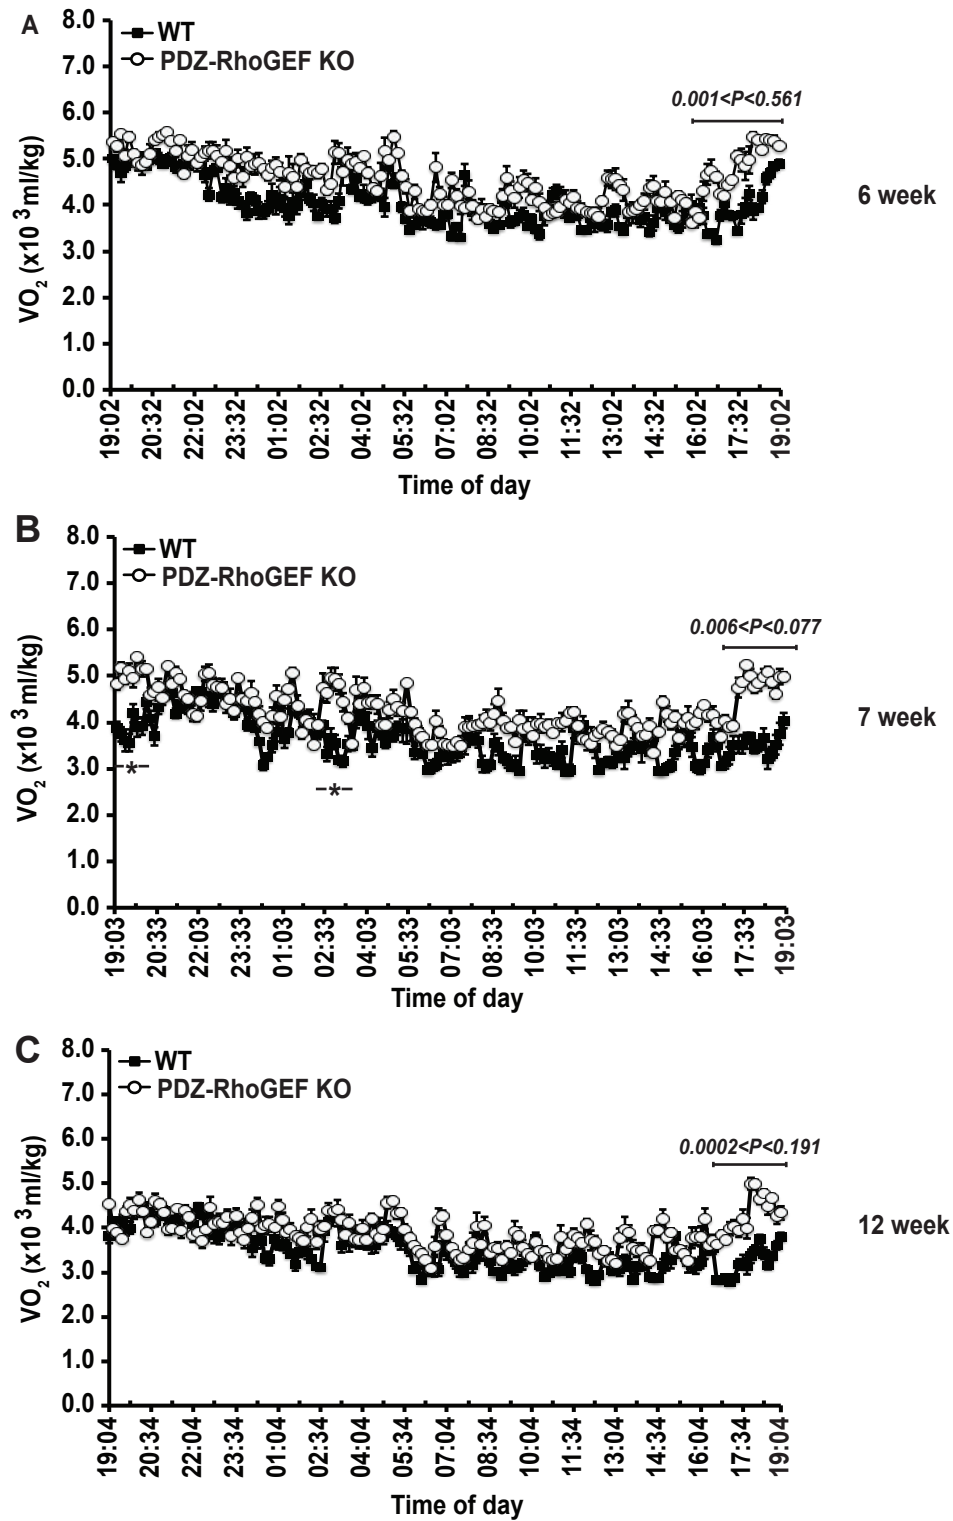

Chang et al. Figure 2, supplement 2

Supplement: supp [file elife_poa_e06011_Figure_2_figure_supplement_2.pdf › elife_poa_e06011_Figure_2_figure_supplement_2.pdf]

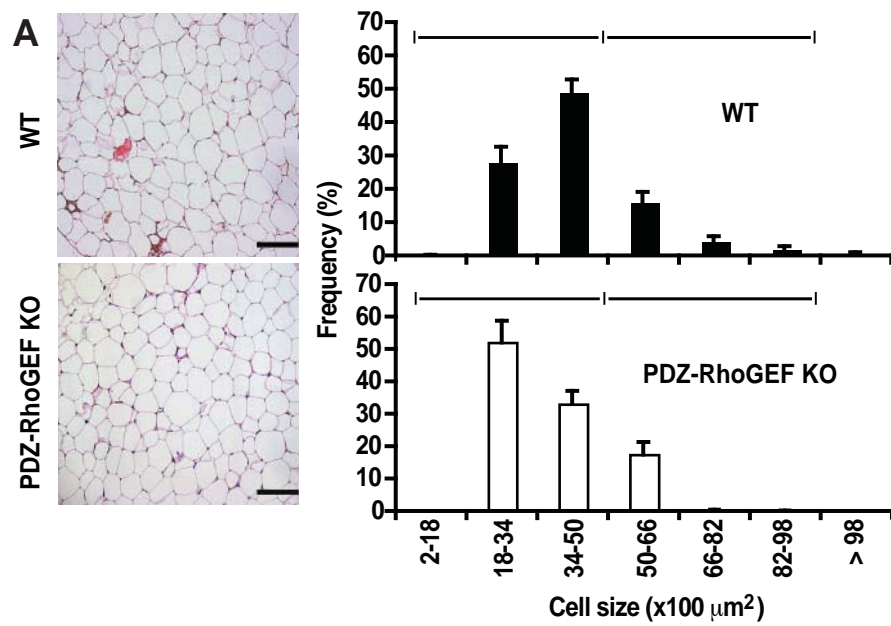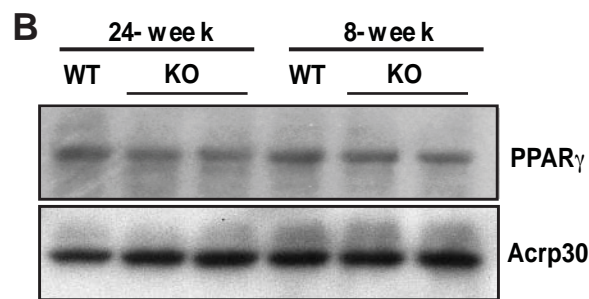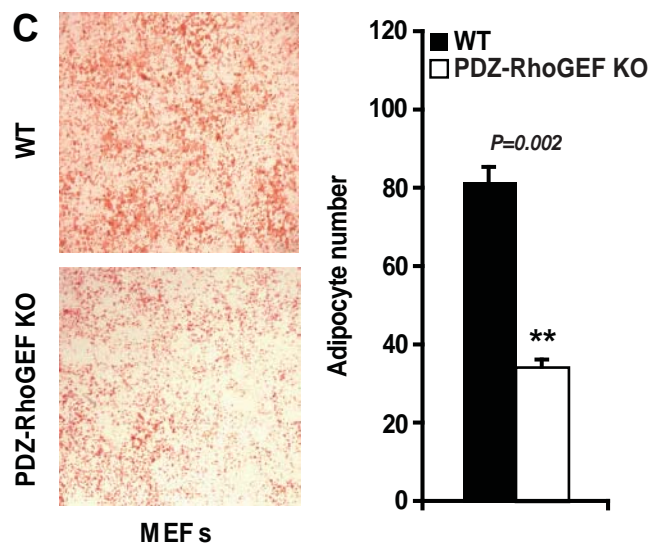

Supplement: supp [file elife_poa_e06011_Figure_3_figure_supplement_1.pdf › elife_poa_e06011_Figure_3_figure_supplement_1.pdf]

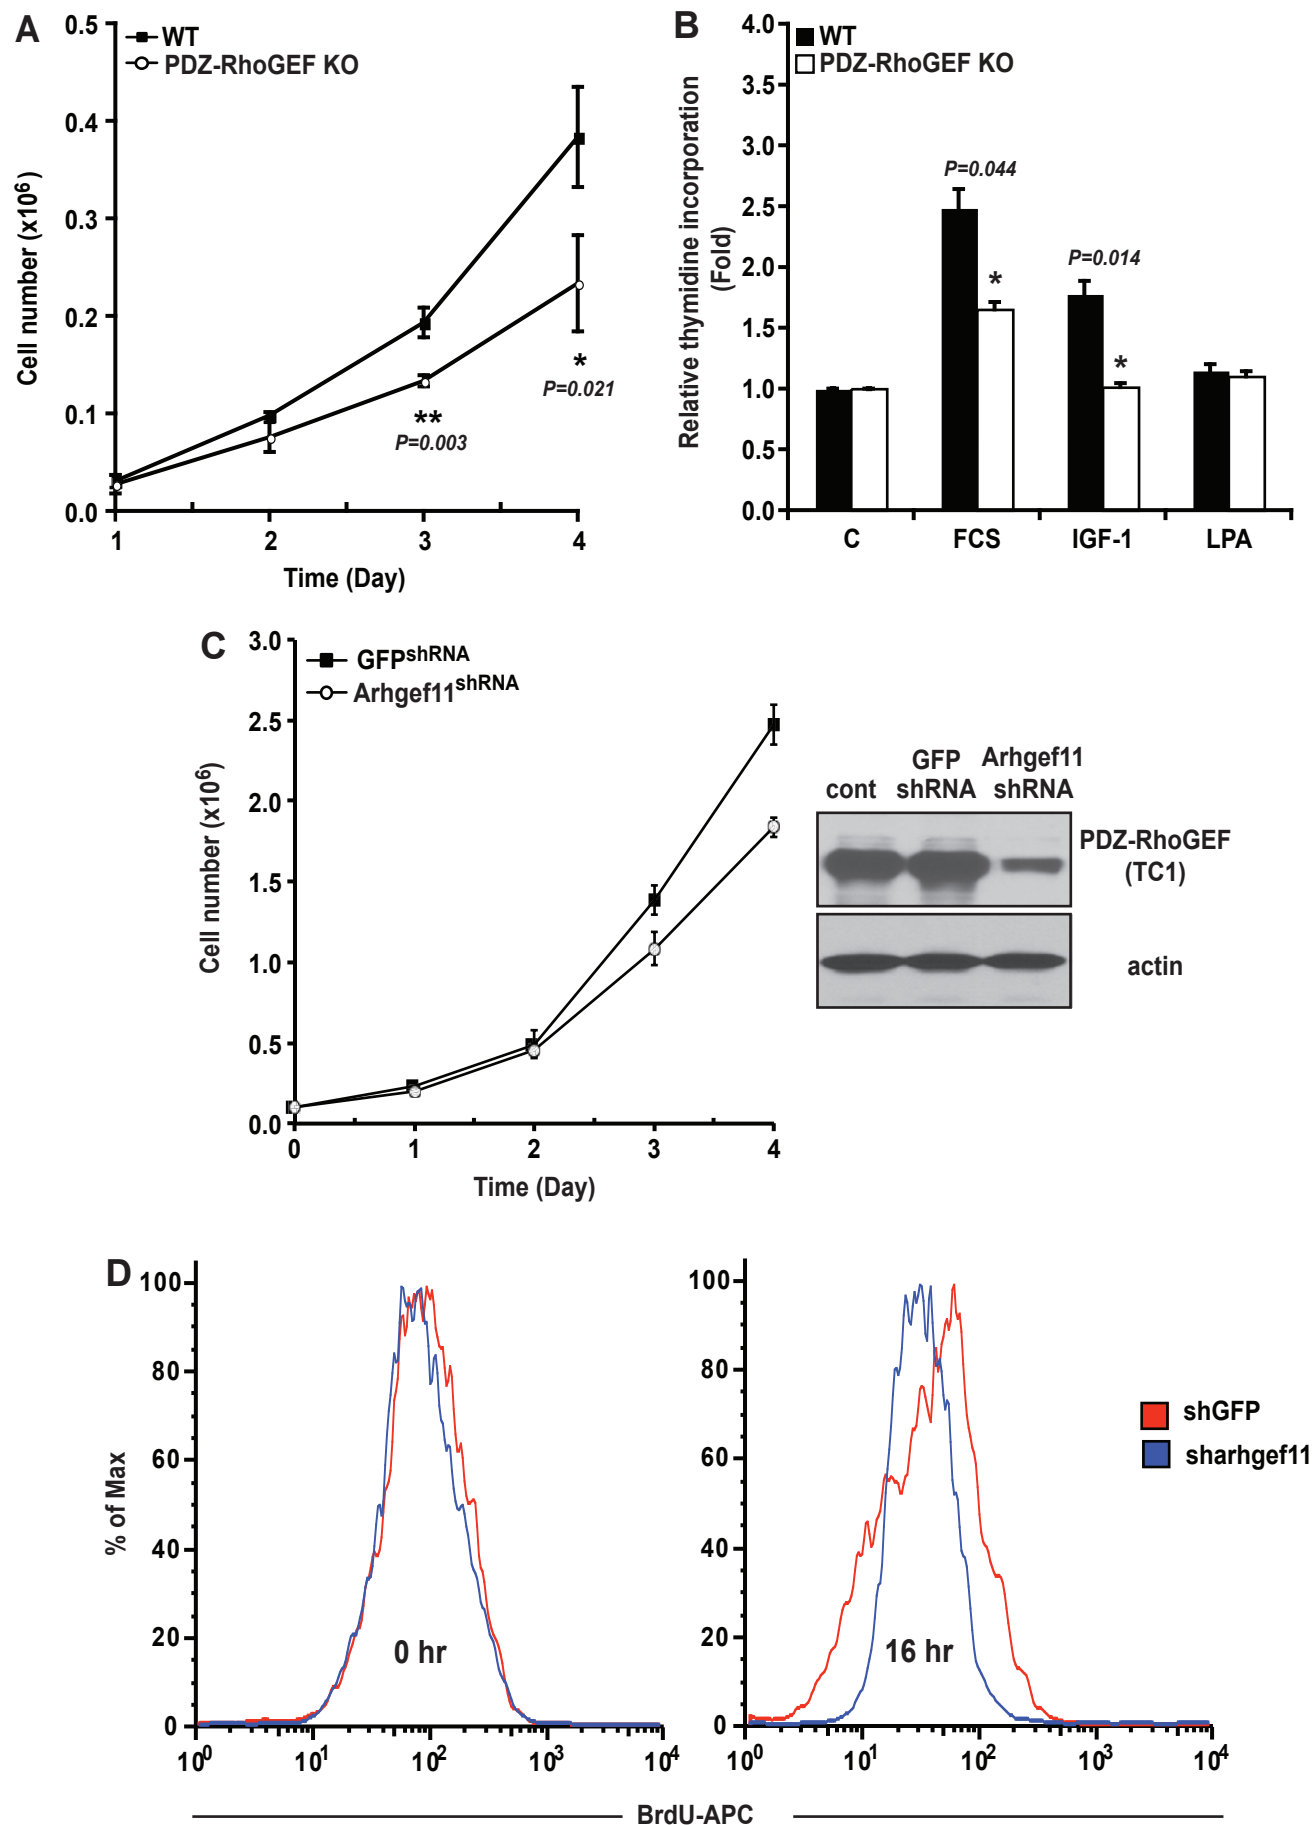

Chang et al. Figure 3, supplement 2

Supplement: supp [file elife_poa_e06011_Figure_3_figure_supplement_2.pdf › elife_poa_e06011_Figure_3_figure_supplement_2.pdf]

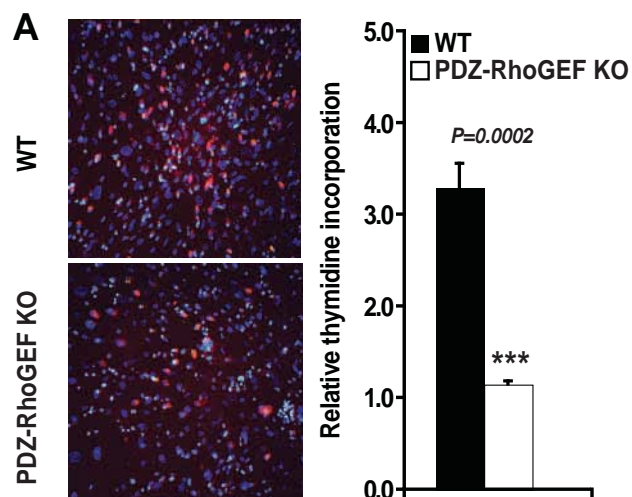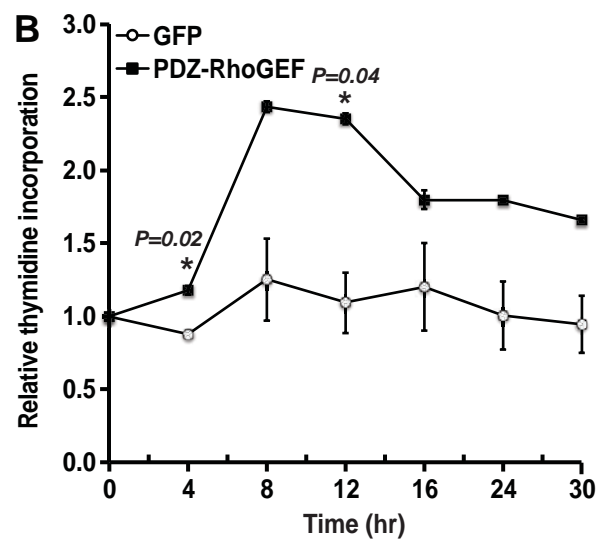

Supplement: supp [file elife_poa_e06011_Figure_3_figure_supplement_3.pdf › elife_poa_e06011_Figure_3_figure_supplement_3.pdf]

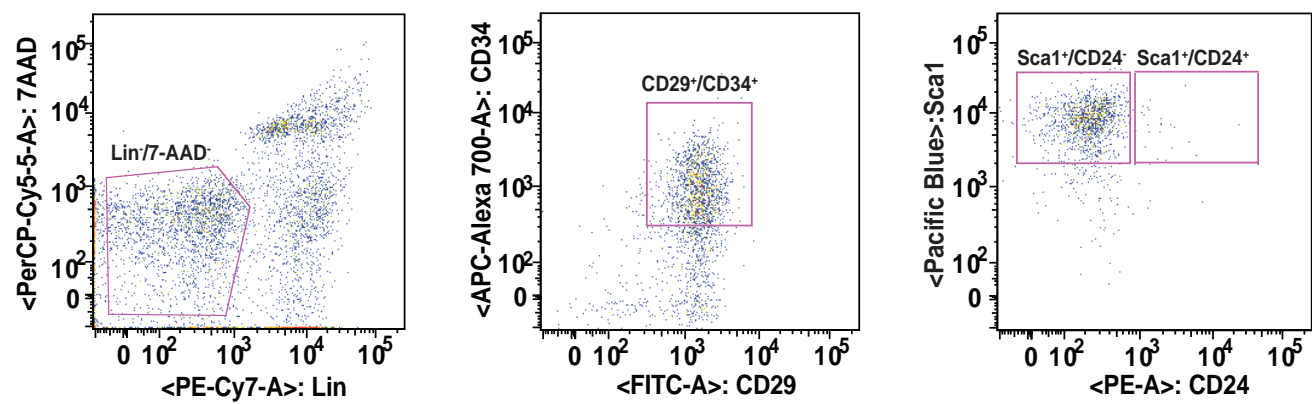

Chang et al. Figure 3, supplement 4

Supplement: supp [file elife_poa_e06011_Figure_3_figure_supplement_4.pdf › elife_poa_e06011_Figure_3_figure_supplement_4.pdf]

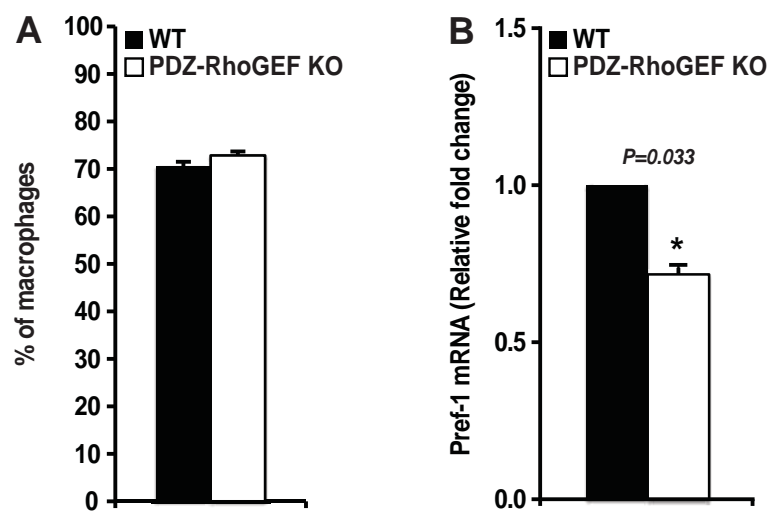

Chang et al. Figure 3, supplement 5

Supplement: supp [file elife_poa_e06011_Figure_3_figure_supplement_5.pdf › elife_poa_e06011_Figure_3_figure_supplement_5.pdf]

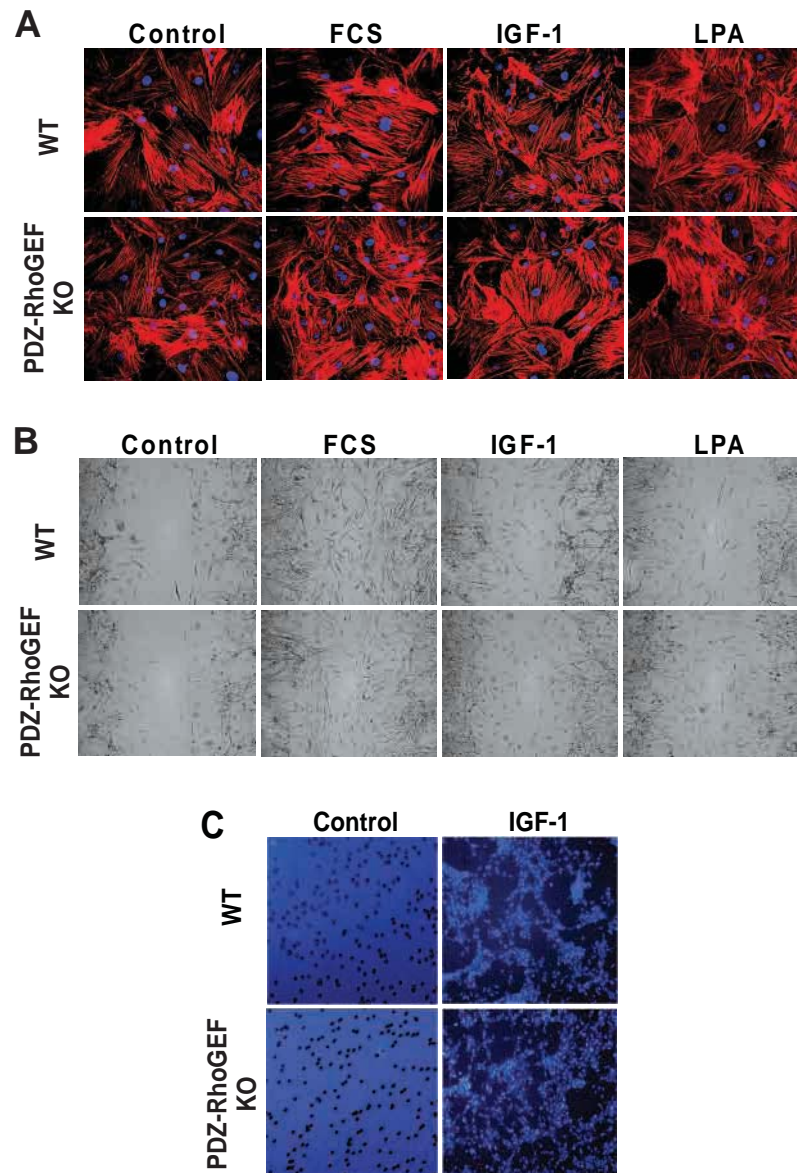

Chang et al. Figure 4, supplement 1

Supplement: supp [file elife_poa_e06011_Figure_4_figure_supplement_1.pdf › elife_poa_e06011_Figure_4_figure_supplement_1.pdf]

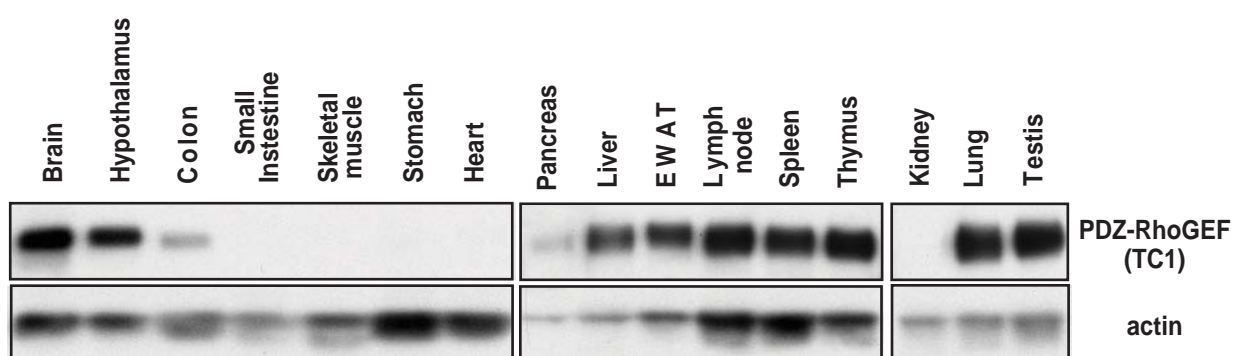

Chang et al. Figure 5, supplement 1

Supplement: supp [file elife_poa_e06011_Figure_5_figure_supplement_1.pdf › elife_poa_e06011_Figure_5_figure_supplement_1.pdf]

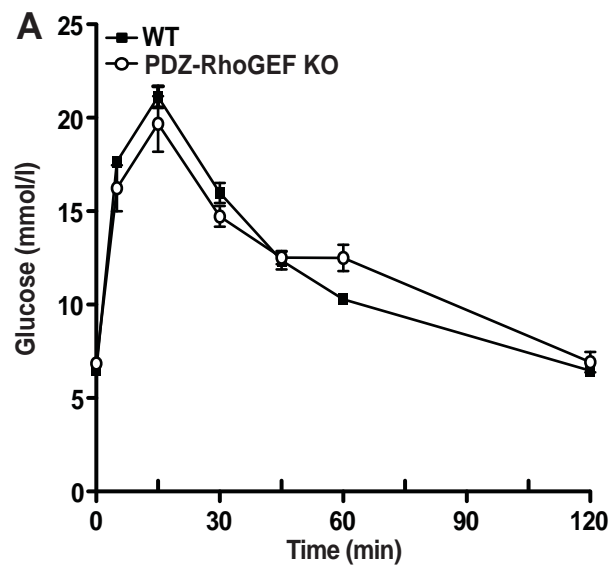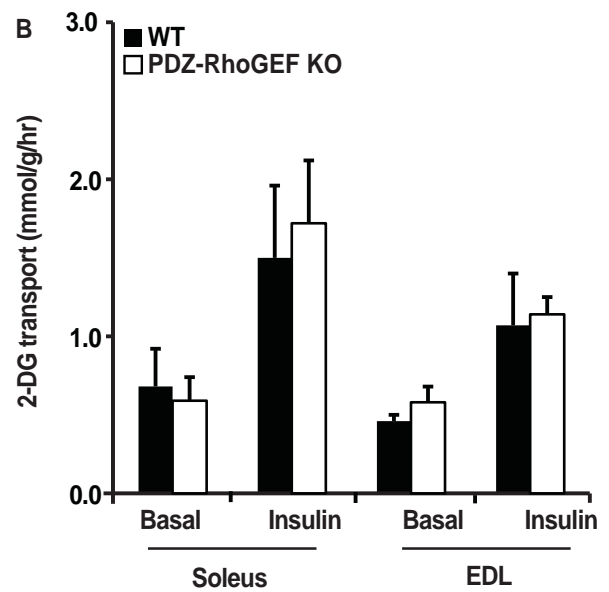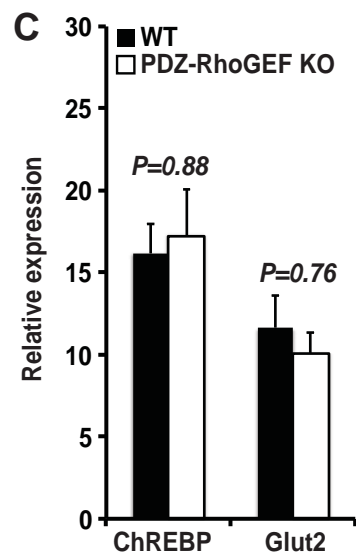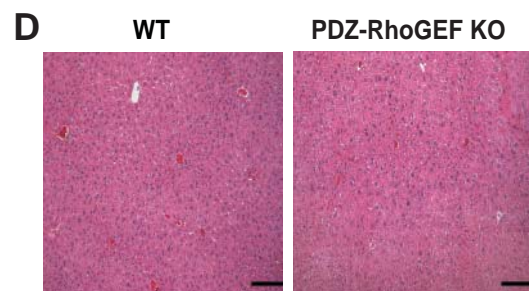

Chang et al. Figure 6, supplement 1

Supplement: supp [file elife_poa_e06011_Figure_6_figure_supplement_1.pdf › elife_poa_e06011_Figure_6_figure_supplement_1.pdf]

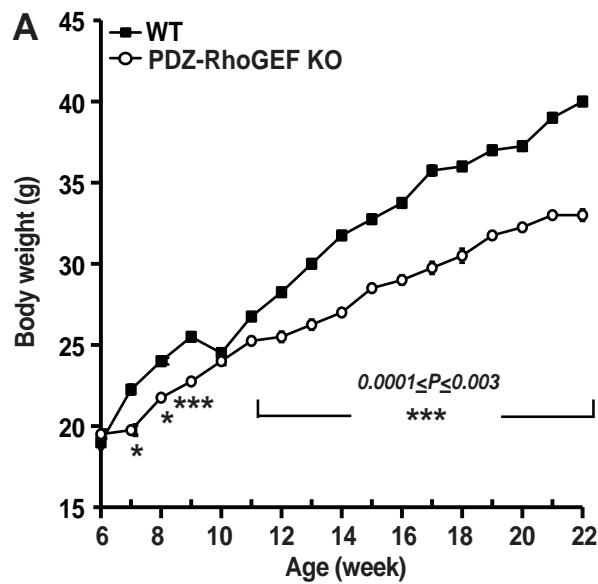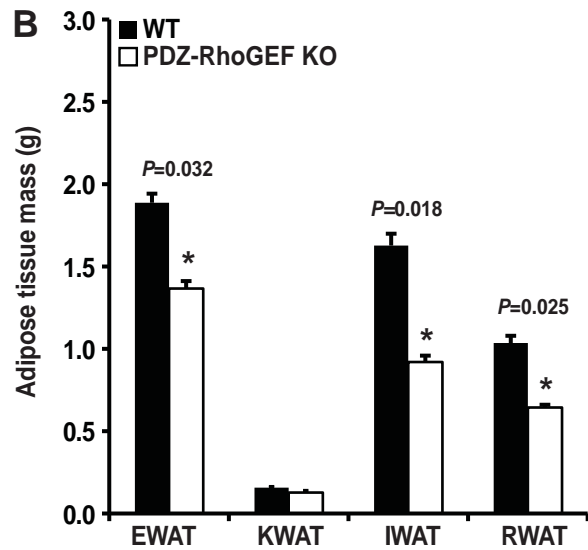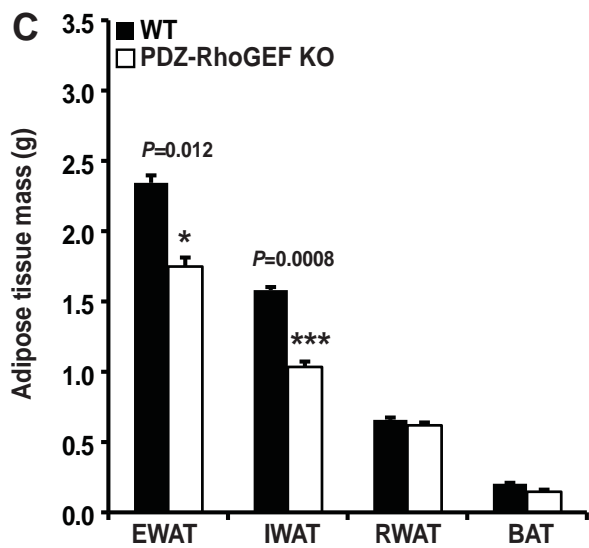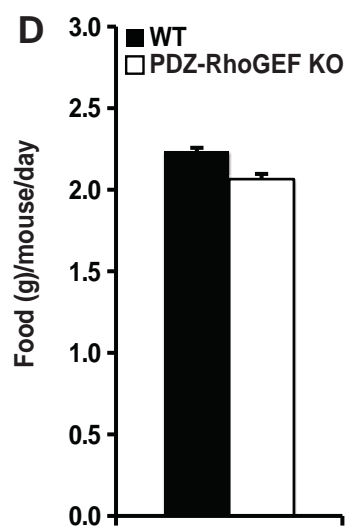

Chang et al. Figure 6, supplement 2

Supplement: supp [file elife_poa_e06011_Figure_6_figure_supplement_2.pdf › elife_poa_e06011_Figure_6_figure_supplement_2.pdf]

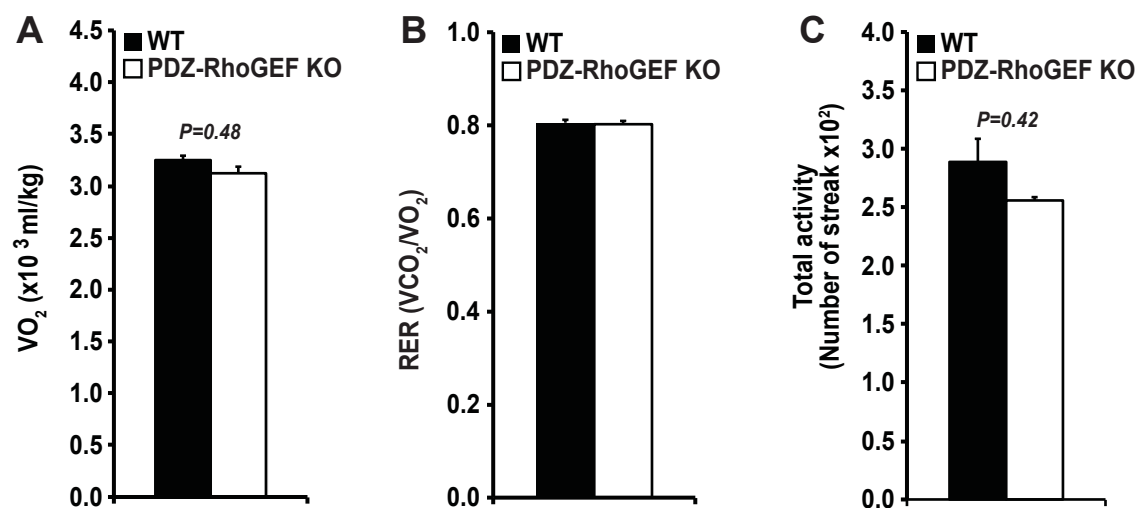

Chang et al. Figure 6, supplement 3

Supplement: supp [file elife_poa_e06011_Figure_6_figure_supplement_3.pdf › elife_poa_e06011_Figure_6_figure_supplement_3.pdf]

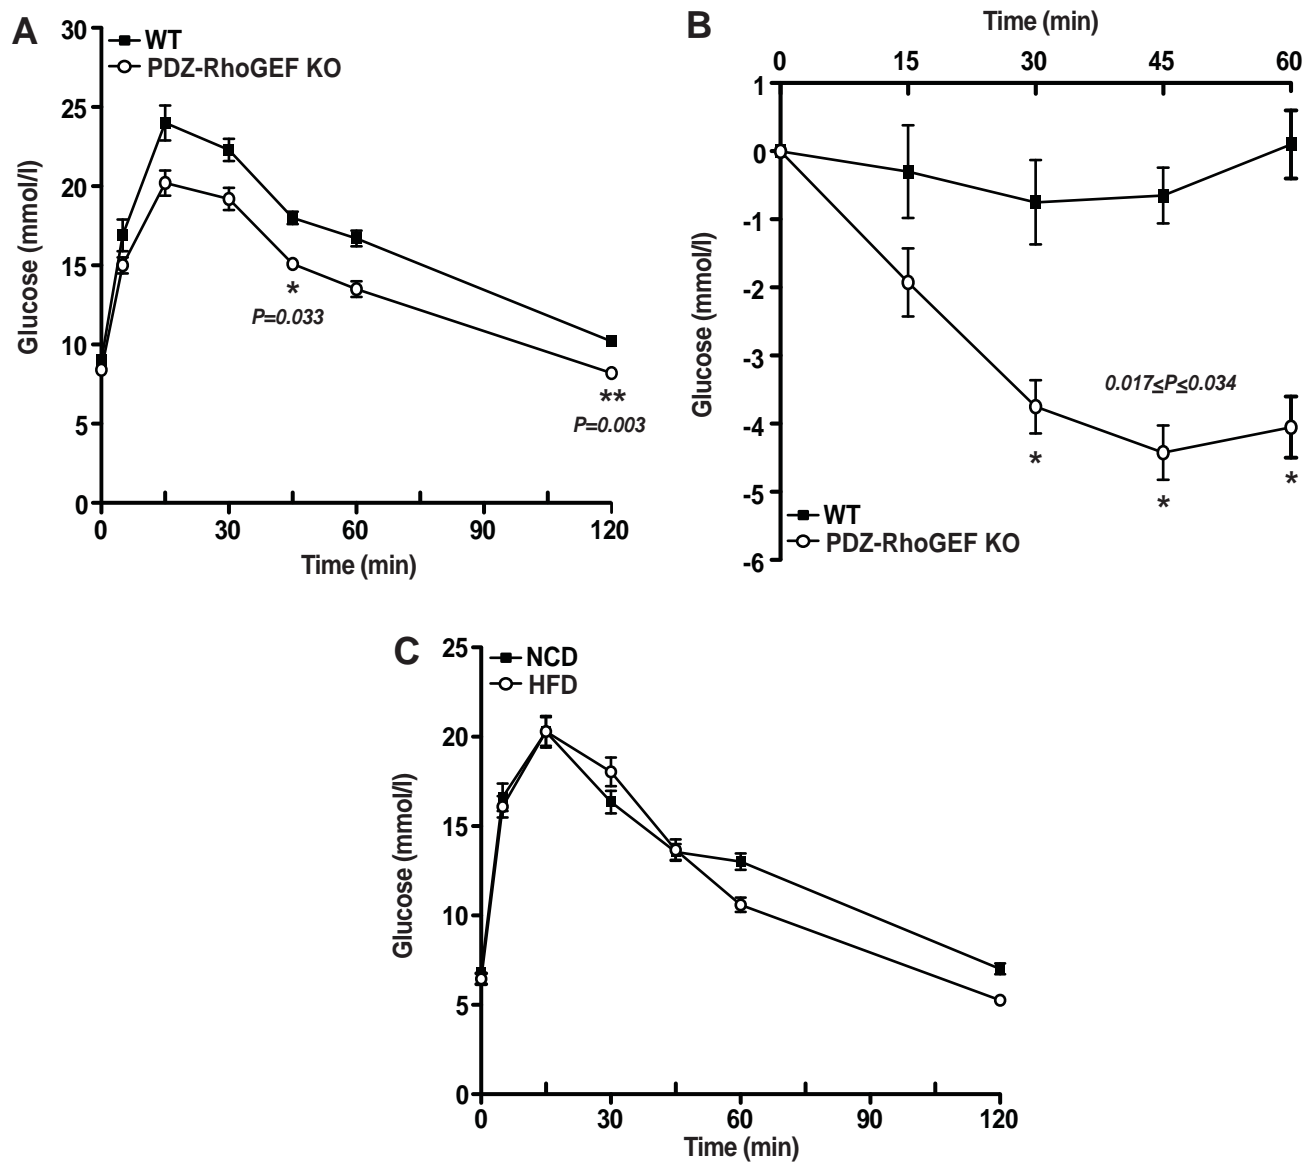

Chang et al. Figure 6, supplement 4

Supplement: supp [file elife_poa_e06011_Figure_6_figure_supplement_4.pdf › elife_poa_e06011_Figure_6_figure_supplement_4.pdf]

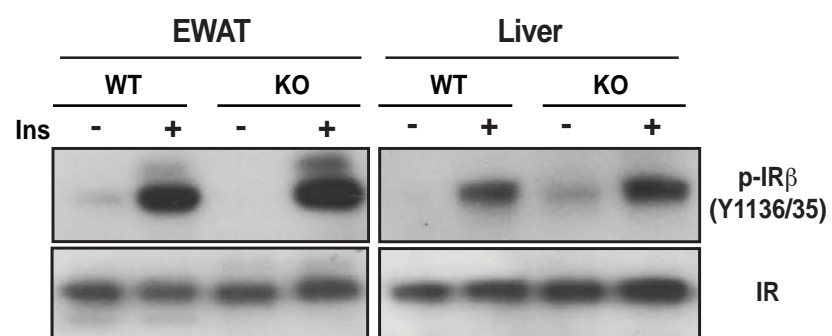

Chang et al. Figure 7, supplement 1

Supplement: supp [file elife_poa_e06011_Figure_7_figure_supplement_1.pdf › elife_poa_e06011_Figure_7_figure_supplement_1.pdf]
